# Supplementary material for: Functional Identification of Salt-Stress-Related Genes Using the FOX Hunting System from Ipomoea pes-caprae
Source: MDPI journal article supplement (doi:10.3390/ijms19113446), 2018-11-02

## Supplementary Information

**Table S1.** Sequence analysis of 42 randomly selected clones (*Ipseq1-Ipseq42*) from the cDNA expression library of *I. pes-caprae*.

**Table S2.** 5' UTR sequence (for the longest ORFs) analysis of 42 randomly selected clones in the pYES-DEST52 cDNA expression library of *I. pes-caprae*.

**Table S3.** The sequence information of *I. pes-caprae* cDNAs listed in this paper.

**Table S4.** Primers for RT-PCR detection of candidate salt stress related genes responding to NaCl and mannitol.

**Figure S1.** RT-PCR analysis of the other 31 salinity-tolerant candidate genes (*IpSRs*) and *IpUBQ* in the roots, vines, and leaves of *I. pes-caprae* seedlings under salinity (300 mM NaCl) stress at 0 and 24 h. All determinations were carried out for three biological replicates.

**Figure S2.** RT-PCR analysis of the other 31 salinity-tolerant candidate genes (*IpSRs*) and *IpUBQ* in the roots, vines, and leaves of *I. pes-caprae* seedlings under dehydration (right, 300 mM mannitol) at 0 and 24 h. All determinations were carried out for three biological replicates.

**Table S1**

| Clone   | GenBank accession number | Functional annotation                                                             | Length of cDNAs and proteins encoded by the longest ORFs | Note     |
|---------|--------------------------|-----------------------------------------------------------------------------------|----------------------------------------------------------|----------|
| Ipseq1  | MF680552                 | L-arabinokinase-like isoform X1                                                   | 1092 bp, 311 aa                                          | Partial  |
| Ipseq2  | MF765740                 | uncharacterized protein At1g04910-like                                            | 1876 bp, 513 aa                                          | Complete |
| Ipseq3  | MF765741                 | 21 kDa protein-like isoform X1                                                    | 822 bp, 202 aa                                           | Complete |
| Ipseq4  | MF680553                 | zinc finger CCCH domain-containing protein 29-like                                | 1446 bp, 374 aa                                          | Partial  |
| Ipseq5  | MF680554                 | quinone oxidoreductase                                                            | 1158 bp, 193 aa                                          | Partial  |
| Ipseq6  | MF680555                 | uricase-2 isozyme 1                                                               | 1092 bp, 244 aa                                          | Partial  |
| Ipseq7  | MF680556                 | 60S ribosomal protein L24                                                         | 941 bp, 124 aa                                           | Partial  |
| Ipseq8  | MF680557                 | zinc finger CCCH domain-containing protein 29-like                                | 916 bp, 169 aa                                           | Partial  |
| Ipseq9  | MF680558                 | pyruvate dehydrogenase E1 component subunit beta-1, mitochondrial-like isoform X2 | 1500 bp, 231 aa                                          | Complete |
| Ipseq10 | MF680559                 | uncharacterized protein                                                           | 961 bp, 185 aa                                           | Partial  |
| Ipseq11 | MF765742                 | V-type proton ATPase subunit C                                                    | 1515 bp, 376 aa                                          | Complete |
| Ipseq12 | MF680560                 | JAZ1                                                                              | 1531 bp, 104 aa                                          | Complete |
| Ipseq13 | MF765743                 | 70 kDa peptidyl-prolyl isomerase-like                                             | 1208 bp, 312 aa                                          | Partial  |
| Ipseq14 | MF680561                 | hypothetical protein MANES_03G205700                                              | 1492 bp, 410 aa                                          | Complete |
| Ipseq15 | MF680562                 | thiosulfate sulfurtransferase 16, chloroplastic-like                              | 925 bp, 184 aa                                           | Partial  |
| Ipseq16 | MF680563                 | glucan endo-1,3-beta-glucosidase 13-like isoform X2                               | 963 bp, 225 aa                                           | Partial  |
| Ipseq17 | MF765744                 | alanine aminotransferase 2                                                        | 1741 bp, 483 aa                                          | Partial  |
| Ipseq18 | MF680564                 | uncharacterized protein LOC104246255 isoform X5                                   | 943 bp, 90 aa                                            | Partial  |
| Ipseq19 | MF680565                 | UDP-glycosyltransferase 91A1-like                                                 | 1129 bp, 233 aa                                          | Partial  |
| Ipseq20 | MF680566                 | probable glycosyltransferase At5g03795 isoform X1                                 | 712 bp, 146 aa                                           | Partial  |
| Ipseq21 | MF680567                 | cathepsin B-like cysteine proteinase                                              | 1250 bp, 353 aa                                          | Complete |
| Ipseq22 | MF680568                 | protein EXORDIUM-like precursor                                                   | 1120 bp, 328 aa                                          | Complete |
| Ipseq23 | MF680569                 | DNA-directed RNA polymerases II, IV and V subunit 6A-like                         | 666 bp, 143 aa                                           | Complete |
| Ipseq24 | MF680570                 | peroxisome biogenesis factor 10                                                   | 1982 bp, 401 aa                                          | Complete |
| Ipseq25 | MF680571                 | Uncharacterized protein TCM_029159                                                | 957 bp, 180 aa                                           | Complete |
| Ipseq26 | MF680572                 | WD40 repeat protein                                                               | 1277 bp, 343 aa                                          | Complete |
| Ipseq27 | MF680573                 | profilin-4                                                                        | 742 bp, 131 aa                                           | Complete |
| Ipseq28 | MF680574                 | serine/threonine-protein kinase HT1-like                                          | 1837 bp, 412 aa                                          | Complete |
| Ipseq29 | MF680575                 | UDP-D-apiose/UDP-D-xylose synthase 2                                              | 1557 bp, 386 aa                                          | Complete |
| Ipseq30 | MF680576                 | PDR1-like protein                                                                 | 1059 bp, 219 aa                                          | Partial  |
| Ipseq31 | MF680577                 | wound-induced protein 1                                                           | 655 bp, 107 aa                                           | Complete |
| Ipseq32 | MF680578                 | glyceraldehyde-3-phosphate dehydrogenase C                                        | 1355 bp, 338 aa                                          | Complete |
| Ipseq33 | MF680579                 | cation transport regulator-like protein 2                                         | 1319 bp, 226 aa                                          | Complete |
| Ipseq34 | MF680580                 | ribosomal RNA-processing protein 14-C                                             | 1272 bp, 123 aa                                          | Partial  |
| Ipseq35 | MF680581                 | acetyl-CoA acetyltransferase, cytosolic 1 isoform X2                              | 1218 bp, 289 aa                                          | Partial  |
| Ipseq36 | MF680582                 | probable galacturonosyltransferase-like 10                                        | 1254 bp, 366 aa                                          | Complete |
| Ipseq37 | MF680583                 | xyloglucan endotransglucosylase XET1                                              | 1049 bp, 296 aa                                          | Complete |
| Ipseq38 | MF765745                 | isocitrate lyase-like                                                             | 2045 bp, 575 aa                                          | Complete |
| Ipseq39 | MF680584                 | WW domain-containing protein C11B10.08                                            | 1177 bp, 267 aa                                          | Complete |
| Ipseq40 | MF680585                 | probable E3 ubiquitin-protein ligase XERICO                                       | 830 bp, 195 aa                                           | Complete |
| Ipseq41 | MF680586                 | asparagine synthase (glutamine- hydrolyzing)                                      | 1782 bp, 473 aa                                          | Partial  |
| Ipseq42 | MF765746                 | LOX3                                                                              | 2723 bp, 829 aa                                          | Partial  |

Table S2

| Clone          | Upstream sequence of Start codon ATG                                                                                                                                                                                                                                                                                                                                                                                                                                                                                             |
|----------------|----------------------------------------------------------------------------------------------------------------------------------------------------------------------------------------------------------------------------------------------------------------------------------------------------------------------------------------------------------------------------------------------------------------------------------------------------------------------------------------------------------------------------------|
| <i>Ipseq1</i>  | AGGTAGAAAACCATGTTGTTGGGGCTCCATGTGGTGTA <u>ATG</u> GAC (-38 to +6)                                                                                                                                                                                                                                                                                                                                                                                                                                                                |
| <i>Ipseq2</i>  | ACCCAGTGCCGACCACC <u>ATG</u> TGG (-17 to +6)                                                                                                                                                                                                                                                                                                                                                                                                                                                                                     |
| <i>Ipseq3</i>  | AG <u>ATG</u> AAA (-2 to +6)                                                                                                                                                                                                                                                                                                                                                                                                                                                                                                     |
| <i>Ipseq4</i>  | CTCAGTACAAGACCCGCCTGTGTAAGGATGAGACTGGATGCTCGAGGAAAAGTGTGCTTCTTTGCT<br>CACAAGCCCGAGGAGCTACGCCCCTGTATGCTTCAACTGGCTCGGCCATTCTTCGCCAAAGTC<br>TGGTTCAGTGAGTTCA <u>ATG</u> GAC (-146 to +6)                                                                                                                                                                                                                                                                                                                                            |
| <i>Ipseq5</i>  | GCAGTTGTGATCACAAACGCCCGGCGGACCGGAAGTCCTGCAAATTCAGAAGTGGAAGACCCGA<br>AGATCAAGGACGATGAAGTGCTGATCAGAGTGGCAGCCACCGCGCTGAACAGAGCCGACACCCT<br>TCAGCGCCAAGGAAAATACCCACCGCCGAAGGGCGACAGTGAATACCCAGGTCTTGAGTGCTCC<br>GGCACCGTTGAAGCTGTGGGCAAAAATGTCGAAAAGTGGAAAGTGGGTGACCAGGTGTGTGCTC<br>TCGTTGGTGGTGGAGGCTATGCTGAGAAAGTAGCTGTACCTGCTGGACAGGTCTTCTGTTCCAT<br>CAGGTGTTTCTTTGCAAGATGCAGCTAGTTCCAGAGGTGGCGTGTACTGTTGGTCGACTGTCTT<br><u>TATG</u> ATG (-390 to +6)                                                                             |
| <i>Ipseq6</i>  | AGGACGGATTTAAGTGCAGCAGAGGCACGGGAAGGCAAGGGTGAGAGTTGGCCGGGTATGGA<br>GAGACGGAGACGGTACGCATCACTTTTCCGAATGGAACGTCAGCATAAGCCTCCTCTCCGACTGC<br>CTCCCCGCTACGTCGCAGGCGACAACCTCAGACATCGTCGCCACCGATAACC <u>ATG</u> AAG (-179 to +6)                                                                                                                                                                                                                                                                                                          |
| <i>Ipseq7</i>  | CAACACAGTTCTCAGCAGCC <u>ATG</u> GTT (-20 to +6)                                                                                                                                                                                                                                                                                                                                                                                                                                                                                  |
| <i>Ipseq8</i>  | TTCCTTGTTCCCATTTGCAGGGTCTCTCGCCAAAGGTTGCAAGAAGCAGCAGCTCCAGCTGCAAT<br>CCCCAACCGGGCTTCAAATTCGCCAAAAC <u>ATG</u> AAC (-94 to +6)                                                                                                                                                                                                                                                                                                                                                                                                    |
| <i>Ipseq9</i>  | GAATCTGCTGCGCTTGCCATAACAAATACGAAGCCGGCTTTTAGGAATTTGTTGCCCAAACATTC<br>CTCCATCAAACAGTCAAATATCTCCAGGGCTGTGATTGCGTCAGTAGAAGAGGATTGAT <u>ATG</u> TCT<br>(-126 to +6)                                                                                                                                                                                                                                                                                                                                                                  |
| <i>Ipseq10</i> | ACAGAATAATGCCGAACAAGAAATATCTGATACCAGTAAATCAGACCCAATTACAGAAGAGCAAT<br>CAGAGGACACTCAG <u>ATG</u> GTA (-79 to +6)                                                                                                                                                                                                                                                                                                                                                                                                                   |
| <i>Ipseq11</i> | ACGAGAATACAGAGTGAGTGATCAGAGAGGTGTCGAACTGGTTTGATCCATTTCTATTCTCTGCAA<br>TCCAACCTCAATTGTTGCAGTAAAGCACGAAGAAGAATAAGAGATCCGATTCCA <u>ATG</u> GCG (-120 to<br>+6)                                                                                                                                                                                                                                                                                                                                                                      |
| <i>Ipseq12</i> | GAAATCTGATATGCCTAATGCTGCAACCACTATCGACTTCCTATCCAACATGGAGAAATCAAGTCA<br>GACTCCAGAACTGGACTTTAATTCGACAGATCCCTCCCTGAGCAGGATGATGCTATGGGGTCTGT<br>TAGAACAATGGAGGAAAACGCAAATGAAGCTAGTATTAGGTTTTCCCATGTTTTACACCTTCATT<br>GTTTCATACAAATAATGCTCAGTTCATACATTTCTTGCTTGCTTGTGTTTGAGAGATGGTCTGATAT<br><u>CATG</u> TGT (-267 to +6)                                                                                                                                                                                                              |
| <i>Ipseq13</i> | AAGATGGAATATTTTTGTTAAAAAGGGGAGCGATGAGGAACCATTTGAATTCAAAGTTGATGAA<br>GACCAAGTTATTGATGGACTTGACAAAGCTGTAAAAACA <u>ATG</u> AAG (-104 to +6)                                                                                                                                                                                                                                                                                                                                                                                          |
| <i>Ipseq14</i> | TTATTTTATTAGTGTTTTAATTTTATTTTTCCTCCATTTGGAGCTCCATGTGGG <u>ATG</u> CTC (-58 to<br>+6)                                                                                                                                                                                                                                                                                                                                                                                                                                             |
| <i>Ipseq15</i> | AAAGTTATCTCTGCCCAACGTACAACCTCTATAGTGAACCTATCAACCTAGCTAAGATCATCGTATT<br>CATCTGAACTGAAGCGGCCGAGCA <u>ATG</u> ATG (-92 to +6)                                                                                                                                                                                                                                                                                                                                                                                                       |
| <i>Ipseq16</i> | GATCCTAACAATGGCCTTGTTTACAAAAGCCTGCTGGAGGCGCAACTCGACGCCGTCTTCGCCGC<br><u>CATG</u> AAA (-66 to +6)                                                                                                                                                                                                                                                                                                                                                                                                                                 |
| <i>Ipseq17</i> | TATTCGTCCACTCCCTCACTCTTCAATCCATCAATCCCAAGGTTCTGAAATGTGAGTATGCTGTTC<br>GTGGAGAAATTGTCAGCCTTGCTCAGAAAATACAAGAAGAGTTACAGGCAAAACCAGGTTCTCA<br>CCCATTTGATGAGATAATTTATTGCAATATTGGAACCCCTCAATCCCTTGGTCAGCAGCCAATTACT<br>TTCTTTAGGGAGGTGCTTGCAATTATGTGACCATCCTTCTATTTTGGATAAAAGTGAAACTCAAGGCC<br>TCTTCAGTGCGGACTCCATAGAGCGAGCTTCCAGATCCTTGATCAAATTCAGGAAGAGCAACT<br>GGTGATACAGCCATAGTCAGGGTATCAAAGGATTGCGTGATACAATTGCTTCTGGTATAGAAGCT<br>CGCGATGGTTTCCCTGCCAATCCAAATGACATTTTCTTGACTGATGGTGCAAGCCAGCGGTTAC<br><u>ATG</u> ATG (-462 to +6) |
| <i>Ipseq18</i> | ATTCTAAAGTGCACAGGAGGTTCTATACAGTAAACGCCAATGGATGCAACAACAATAGTACTGCT<br>CCCCGTGTGTAGGGTGGGTAGAA <u>ATG</u> ATG (-89 to +6)                                                                                                                                                                                                                                                                                                                                                                                                          |
| <i>Ipseq19</i> | AGGAAGAAGATAACGTTTCCGATGTTTTCCGA <u>ATG</u> CTT (-32 to +6)                                                                                                                                                                                                                                                                                                                                                                                                                                                                      |
| <i>Ipseq20</i> | CTACTCCGGCGCCTCCACGGCCCCATACGCCCAATCCTG <u>ATG</u> CAA (-40 to +6)                                                                                                                                                                                                                                                                                                                                                                                                                                                               |
| <i>Ipseq21</i> | AGAAACAAGAAAAAA <u>ATG</u> GAG (-15 to +6)                                                                                                                                                                                                                                                                                                                                                                                                                                                                                       |
| <i>Ipseq22</i> | CATTCTCTCTCTGATCTCTGATATTTTAGTGAAAAATCCCAGA <u>ATG</u> GCT (-45 to +6)                                                                                                                                                                                                                                                                                                                                                                                                                                                           |
| <i>Ipseq23</i> | GTTTCGGAGCTTTGCTGGTAGGGAGAAGCACCTCAAAA <u>ATG</u> GCG (-38 to +6)                                                                                                                                                                                                                                                                                                                                                                                                                                                                |
| <i>Ipseq24</i> | TCGCCCTCTCGGTCTCTGCCTCTGCCCGACTGCCCGTCGCTCGCCAGTCGCCACGGCCTACGAG<br>ACAGTGAGACACCGTCACCGGTACACCAGACAACCAGTCGCCGCTTCGCCACTCGCCAGCTTC<br>ATCTTCAAGCTTCAACCGTCTTACCAGTTCACCCTCAGTCCGTGCCTCCGTGACTCCGTCCCTG<br>CCGACTGCCGTCACTCATCTTACCCTCAGGCCTCAGTTCTGATTCCGTCCCTGGGCTGAGAG <u>AT</u><br><u>G</u> GGA (-260 to +6)                                                                                                                                                                                                                 |



Table S4

| Clones/Genes             | Sequences of primer pairs (RT-F/RT-R, 5'-3') | Amplicons |
|--------------------------|----------------------------------------------|-----------|
| <i>IpSR1 (IpASR)</i>     | AAGATAGCAGAAAGAGGTGGCG/ACGCATAAGCCCAAACCCAT  | 234 bp    |
| <i>IpSR2 (IpATPD)</i>    | ACATCGTGCAGGAGTTCGAG/GAATCGCCATACCGGATCGT    | 205 bp    |
| <i>IpSR3 (IpNUD)</i>     | AGAGGTACAGCGACAACACC/TTCTGCGAGCTGATCACGAG    | 106 bp    |
| <i>IpSR4 (IpTSJT1-1)</i> | GTGTTCAACAAGTCGGTGGC/CCAAGGTTGATGGTGACGGA    | 140 bp    |
| <i>IpSR5 (IpCDI)</i>     | TCCCCATTGAAATCCACCCG/AAACATGGCCCAACCCTCAT    | 149 bp    |
| <i>IpSR6 (IpFBP)</i>     | TGACTGCGTTATCTCCGACG/GTCACGGAGCTCTGGTCAAA    | 237 bp    |
| <i>IpSR7 (IpCAB21)</i>   | CTTCCACCCCGGAAACTACC/CTTAACACGGTCTGGGCCAT    | 110 bp    |
| <i>IpSR8 (IpERVT)</i>    | CCTTTACGGAGGAGCACGTT/CGCTTTTGGCCGTGGTAAA     | 119 bp    |
| <i>IpSR9 (IpTSJT1-2)</i> | GGTCACCTTGAGGGCAACTT/GAAGAAGCACCTTGTGGGA     | 201 bp    |
| <i>IpSR10 (IpPI1)</i>    | TCCATTTGGTCCACCTGACG/GCTCCAGATCAGGGTGGTTC    | 97 bp     |
| <i>IpSR11 (IpFRK)</i>    | GACCCCGGAGGAGTTGAATC/CCTCAGGTGATGGCCACAAT    | 185 bp    |
| <i>IpSR12 (IpPABP)</i>   | CCATTACTCCGACTCCGACG/GAGATAAGGCTCTTCGGCCC    | 200 bp    |
| <i>IpSR13 (IpTC)</i>     | TGCCAGGCCTCCAAATAAGG/GCGAGCAGTTTTCACGGTTT    | 145 bp    |
| <i>IpSR14 (IpSNARE)</i>  | TGTGCGCATCTCAATCCTCT/CCAGCATCTTGCTTCTCGC     | 108 bp    |
| <i>IpSR15 (IpPT)</i>     | GCGACTATCCACTCTCTGCC/CGTAAGCGTGATCGAAAGCG    | 156 bp    |
| <i>IpSR16 (IpAHCY)</i>   | CAAGGCCGATCCCAAGAAGT/TGGCGGCATCCATACAAGTT    | 183 bp    |
| <i>IpSR17 (IpPUP)</i>    | TCGCTGGTGGGAGATTAGA/TTGGCTTTCACCAACCCCT      | 105 bp    |
| <i>IpSR18 (IpCAT)</i>    | GGCCCCAACTATATGCTGCT/ACGTAACGGAGTTGGGAACC    | 165 bp    |
| <i>IpSR19 (IpSRP)</i>    | GGGGGATTGGATGCTGTGAA/GAACAGACTCTTCGCCGGAA    | 129 bp    |
| <i>IpSR20 (IpRPB7)</i>   | AAGACGTCGAGGGAACCTGC/GGGAAAGTGACGAATCCCGT    | 112 bp    |
| <i>IpSR21 (IpUSP3)</i>   | AACCACGGGCACTATGTCAG/TGGTGCCAGAACATACGCTT    | 181 bp    |
| <i>IpSR22 (IpRPS25)</i>  | GAACAACCAGAATGGCTCCG/AGCTTGTCATAGGTGGCCTT    | 163 bp    |
| <i>IpSR23 (IpPI2)</i>    | ATGGCATGCTTGTAGGACCC/AACGACCTGGCTCAAAACCA    | 150 bp    |
| <i>IpSR24 (IpHP1)</i>    | TGTGCGCGAAGAAGACGAAA/TGCTCGGAGTCTTTGGGAAC    | 129 bp    |
| <i>IpSR25 (IpPMM)</i>    | TCGCACACCTTGATCTCACC/TACACTGCTTGCCGTGTCT     | 225 bp    |
| <i>IpSR26 (IpLEA)</i>    | ACCAACTGCAGATGTGTCCG/CGTCCAGCATCAGGGATCA     | 181 bp    |
| <i>IpSR27 (IpLRRK)</i>   | CTGAGTATGCAATGCGTGCC/GTAGGCGCTTGTGGTGTTG     | 108 bp    |
| <i>IpSR28 (IpDNAJ)</i>   | ACAGATTGCACCTGGCATGA/CCCCCTCTCGACATGCACTT    | 157 bp    |
| <i>IpSR29 (IpPSK)</i>    | TTTCATCGTAGCGTCTCCTCC/CAGAGTCTCCGCATCAGAC    | 172 bp    |
| <i>IpSR30 (IpPSCXI)</i>  | CCCATAACGTCAAGCCCACT/CACAAATGGACCCACCAGGA    | 132 bp    |
| <i>IpSR31 (IpSCP)</i>    | CATCGGCCGTATTTTGCTGG/ACGCCATCCCCAATGGATTT    | 190 bp    |
| <i>IpSR32 (IpHRGP)</i>   | GACGACGACGACTCAGATGG/TTGGGTGATGATATCCGCCG    | 140 bp    |
| <i>IpSR33 (IpGST)</i>    | TCCAGTGCCCTTATGCTCAG/TTGTTGTGCTCCAATGCAGG    | 157 bp    |
| <i>IpSR34 (IpABAH)</i>   | CATGCCATTTGGCAGTGGAG/CGGGAATGGGCCATACTGAA    | 145 bp    |
| <i>IpSR35 (IpSR45a)</i>  | GATGCCAATCGCTGCGTAAA/ACGATAACCTTCTGCCCTGC    | 147 bp    |
| <i>IpSR36 (IpFMT)</i>    | GTGACGGACAAGGAAGGGTT/TCCGGCTTCTCCCGTAGTA     | 170 bp    |
| <i>IpSR37 (IpGBP)</i>    | GTGCTGTCCGTTGCTTCTC/ACCCATTCCGGTGTGACCATC    | 134 bp    |
| <i>IpSR38 (IpDHN)</i>    | CCTGGGTACCACCCAAAGAC/TAAAGTACTTACAGCAAACC    | 246 bp    |
| <i>IpUBQ</i>             | TCGACAATGTGAAGGCAAAG/CTTGATCTTCTTCGGCTTGG    | 209 bp    |

Figure S1

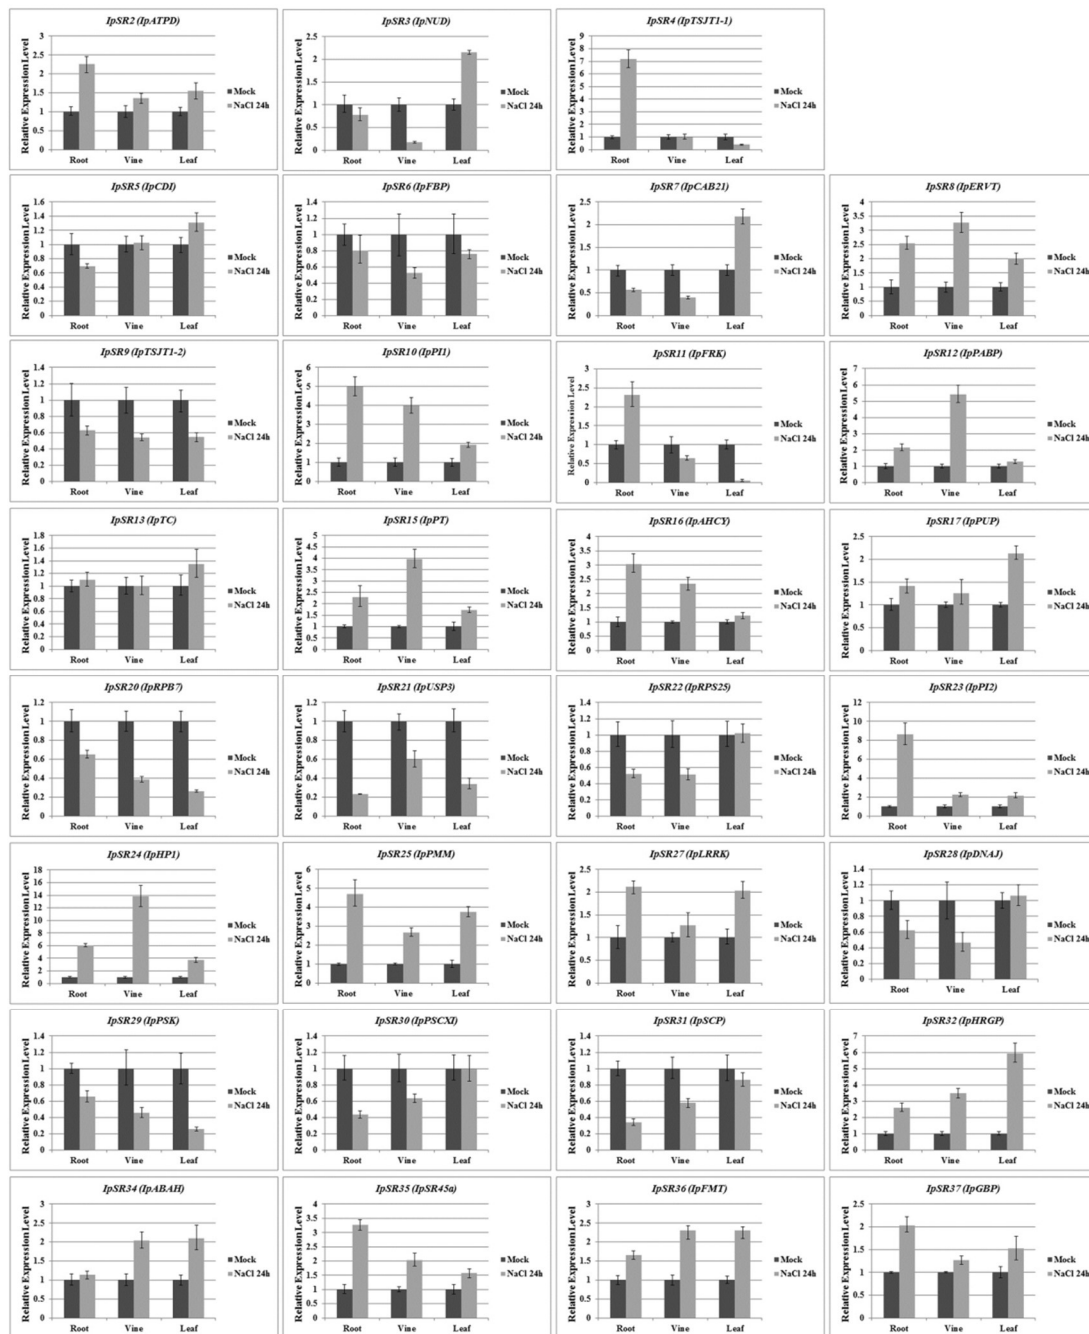

Figure S2

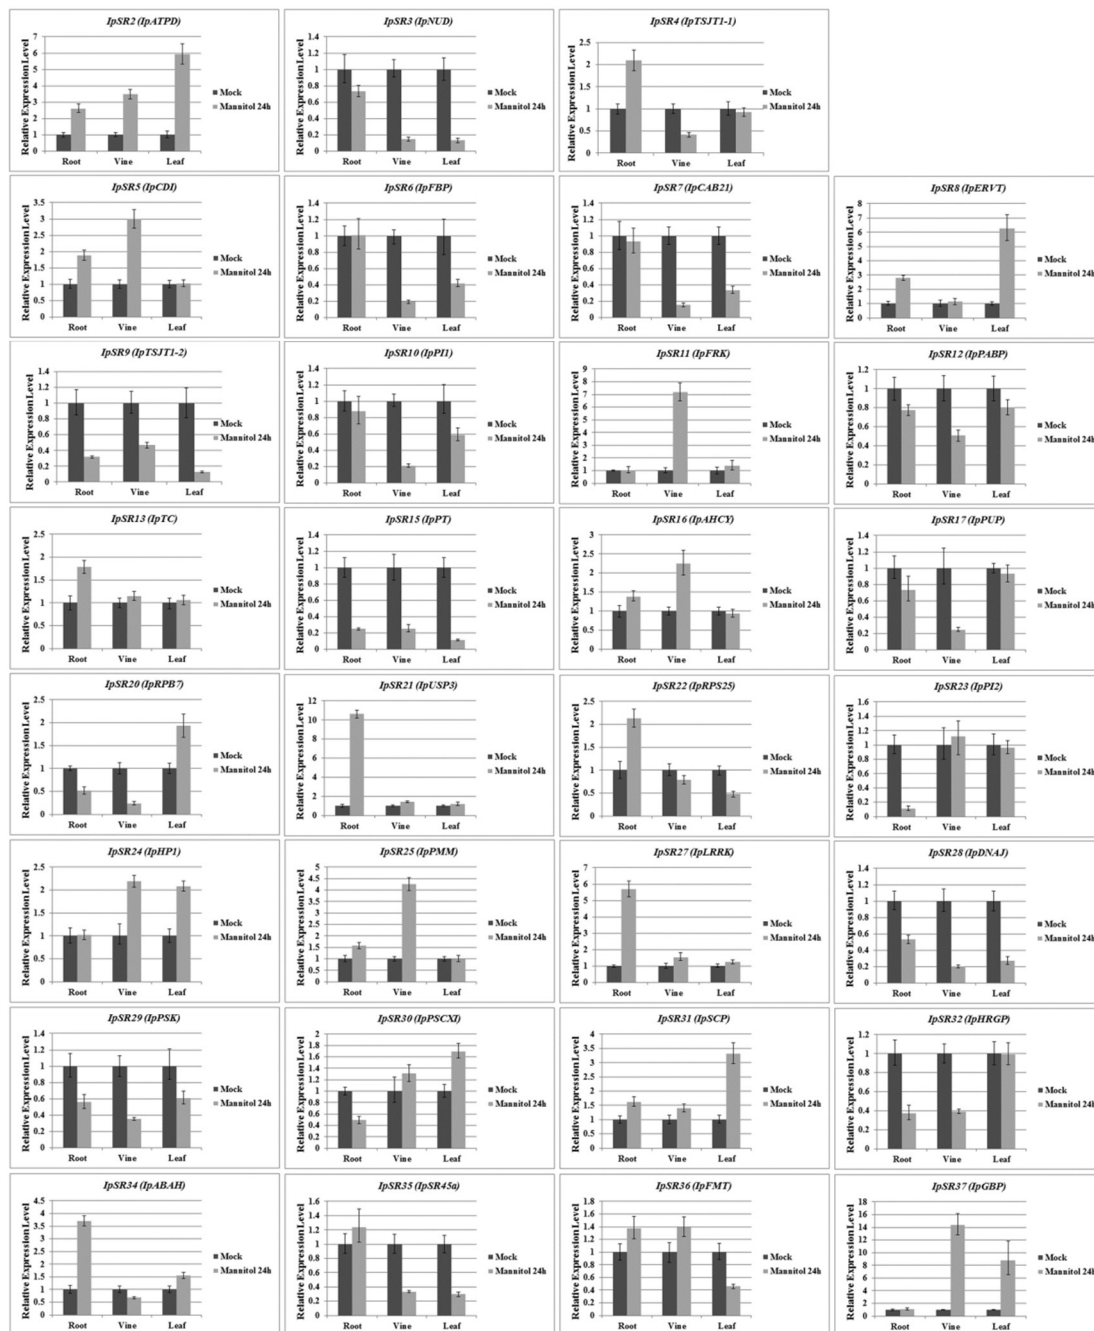

Supplement: s1 [file s1]
